# Supplementary material for: Repurposing of Antimicrobial Agents for Cancer Therapy: What Do We Know?
Source: Cancers (Basel). 2021 Jun 26;13(13):3193. doi: 10.3390/cancers13133193 (PMC8269327; doi:10.3390/cancers13133193)
Supplement: Supplementary file 1 [file cancers-13-03193-s001.zip]

Archive with 5 entries (5 files):
- Supplemental Data Table S1.pdf
- Supplemental Data Table S2.pdf
- Supplemental Data Table S3.pdf
- Supplemental Data Table S4.pdf
- Supplemental Data table S5.pdf
